# Supplementary material for: Adherence to the World Health Organization’s physical activity recommendation in preschool-aged children: a systematic review and meta-analysis of accelerometer studies
Source: Springer Nature journal article supplement (doi:10.1186/s12966-023-01450-0), 2023-04-26
Supplement: MOESM1 [file 12966_2023_1450_MOESM1_ESM.pdf]

| # | Search terms                                                                                                                                                                                                                                     |
|---|--------------------------------------------------------------------------------------------------------------------------------------------------------------------------------------------------------------------------------------------------|
| 1 | physical* activ*" OR "movement behavio*" OR acceleromet* OR "moderate?to?vigorous*" OR mvpa OR sedentary OR exercise* OR "24-h* movement" OR "24-h* activity" OR "time?use behavio*" OR "physical behavio*" OR "active play" OR "energetic play" |
| 2 | guideline* OR recommendation* OR surveillance                                                                                                                                                                                                    |
| 3 | child* OR "early year*" OR "pre?school*" OR "3?year?old*" OR "4?year?old*" OR "5?year?old*" OR "young child*" OR "preschool-aged" OR youth OR "young people" OR "young person*" OR "early?childhood" OR "day?care" OR toddler*                   |
| 4 | 1 AND 2 AND 3                                                                                                                                                                                                                                    |
